# Supplementary material for: Association between serum alkaline phosphatase and bacteraemia in haemodialysis outpatients: a multicentre retrospective cross-sectional study
Source: HighWire-hosted journal article supplement (doi:10.1136/bmjopen-2021-058666), 2022-10-01
Supplement: bmjopen-2021-058666supp001_data_supplement.pdf [file bmjopen-2021-058666supp001_data_supplement.pdf]

## Supplementary Figure: Sensitivity analysis with the addition of CRP

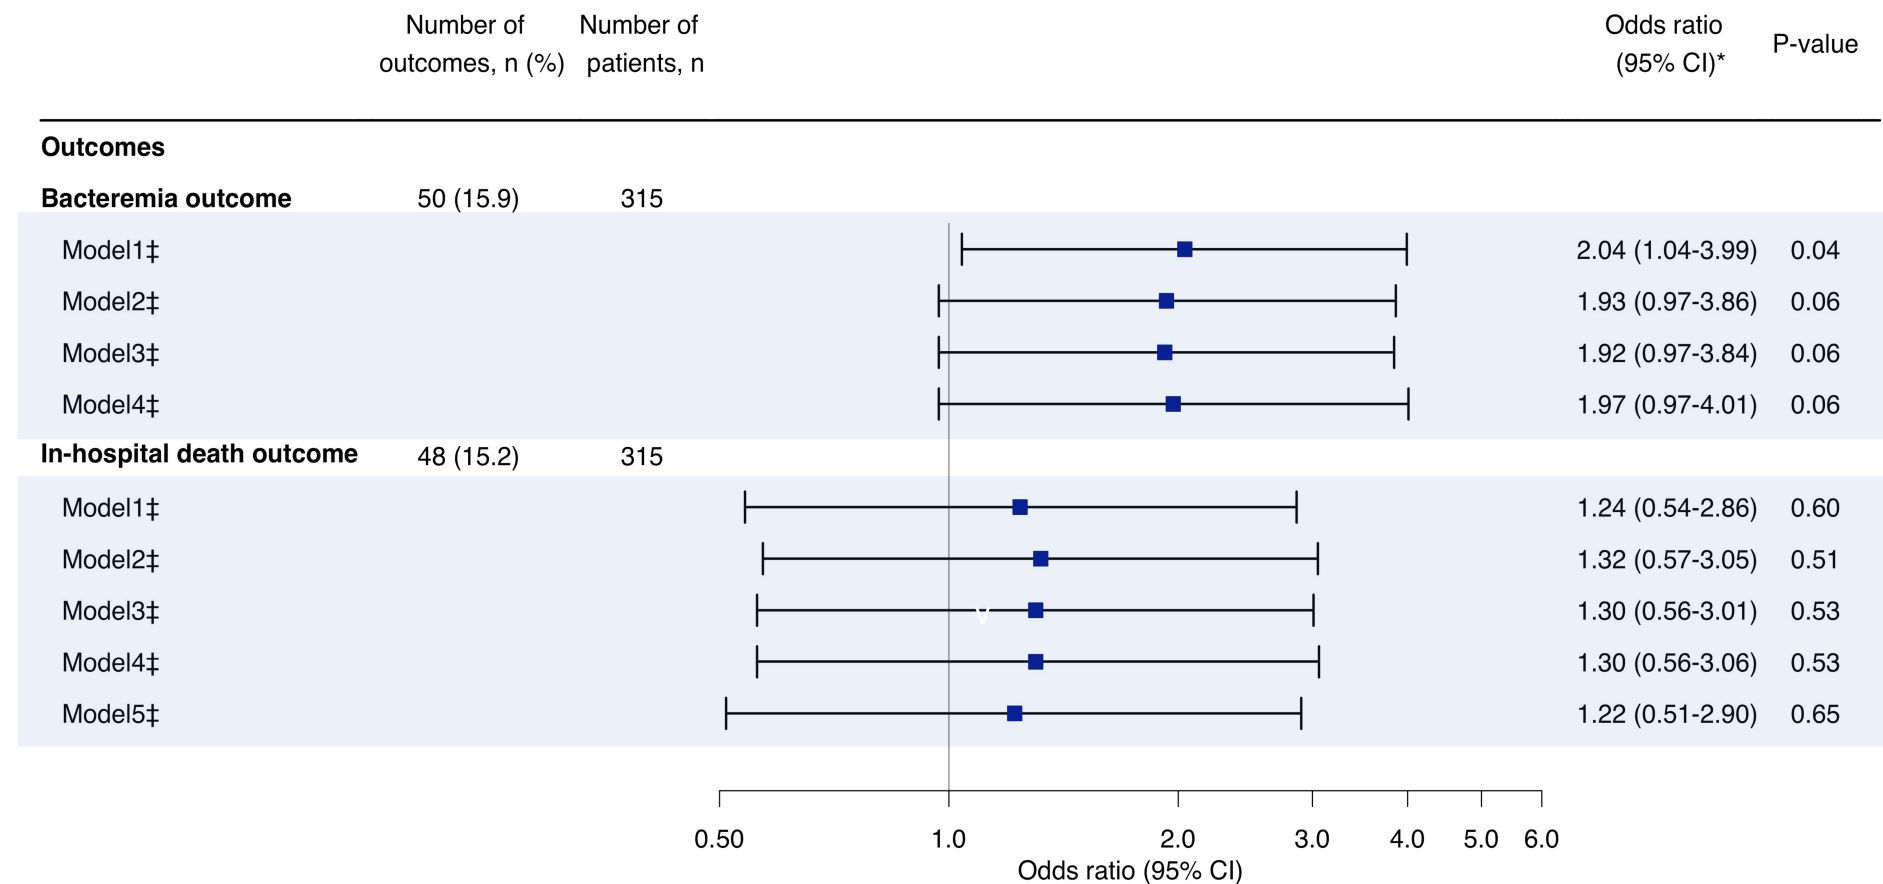

Bacteraemia outcome: Model 1, adjusted for age, sex; Model 2, adjusted for Model 1 + aspartate aminotransferase + CRP; Model 3, adjusted for Model 2 + vitamin D analogue use; Model 4, adjusted for Model 3 + haemodialysis vintage

In-hospital death outcome: Model 1, adjusted for age, sex; Model 2, adjusted for Model 1 + aspartate aminotransferase + CRP; Model 3, adjusted for Model 2 + vitamin D analogue use; Model 4, adjusted for Model 3 + haemodialysis vintage; Model 5, adjusted for Model 4 + presence of bacteraemia
